# Supplementary material for: Generalization of navigation memory in honeybees
Source: Frontiers journal article supplement (doi:10.3389/fnbeh.2023.1070957), 2023-03-06

---

# GENERALIZATION OF NAVIGATION MEMORY IN HONEYBEES

---

## SUPPLEMENT DATA SHEET 02: DIRECTIONAL ANALYSIS

 **Eric Bullinger\***

Otto-von-Guericke-Universität Magdeburg  
Institut für Automatisierungstechnik  
Universitätsplatz 2, 39106 Magdeburg, Germany  
eric.bullinger@ovgu.de

**Uwe Greggers &  Randolph Menzel\***

Freie Universität Berlin  
Neurobiologie  
Königin Luisestr. 1 -3, 14195 Berlin, Germany  
menzel@neurobiologie.fu-berlin.de

14 February 2023

- Direction W: p. 2
- Direction WSW: p. 2
- Direction SW: p. 3
- Direction SSW: p. 3
- Direction S: p. 4
- Direction SSE: p. 4
- Direction SE: p. 5
- Direction ESE: p. 5

- Direction E: p. 6
- Direction ENE: p. 6
- Direction NE: p. 7
- Direction NNE: p. 7
- Direction N: p. 8
- Direction NNW: p. 8
- Direction NW: p. 9
- Direction WNW: p. 9

---

\*corresponding author

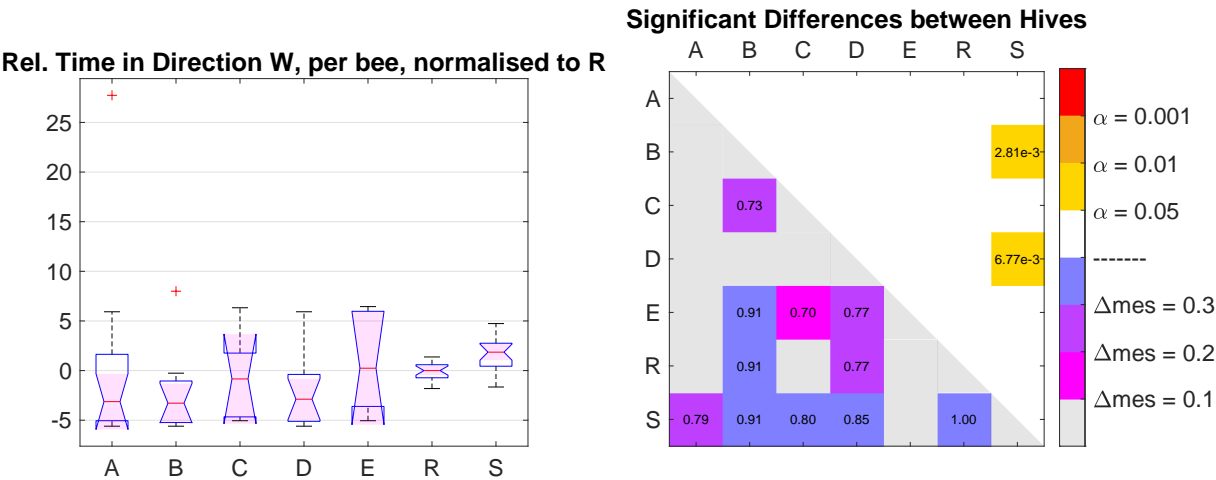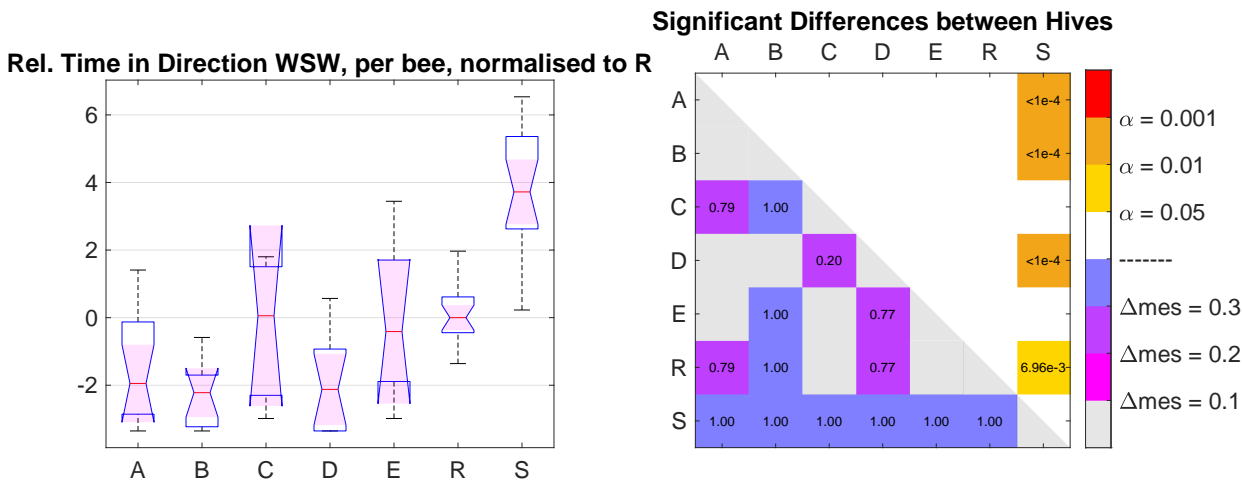

Rel. Time in Direction SW, per bee, normalised to R

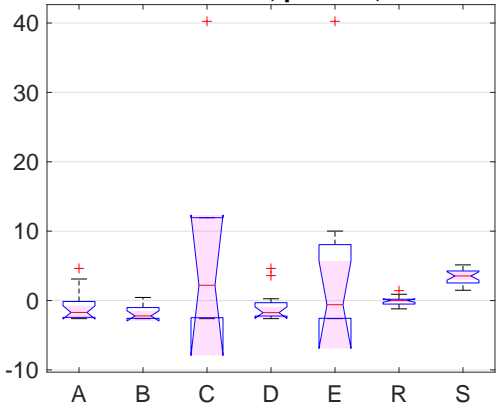

Significant Differences between Hives

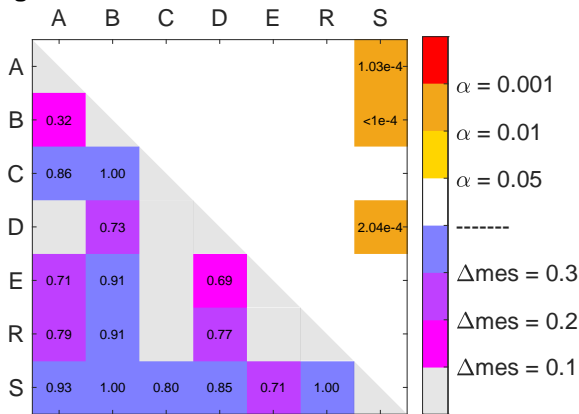

Rel. Time in Direction SSW, per bee, normalised to R

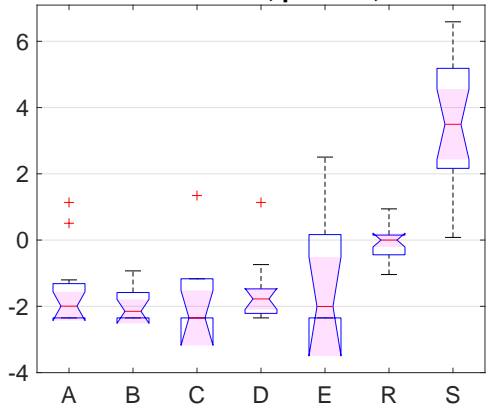

Significant Differences between Hives

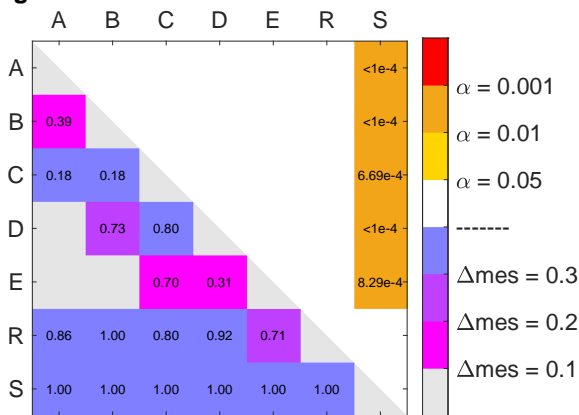

Rel. Time in Direction S, per bee, normalised to R

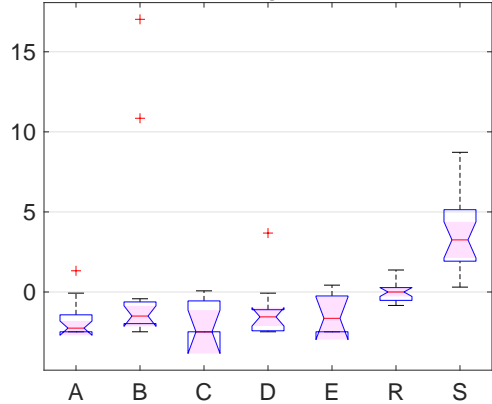

Significant Differences between Hives

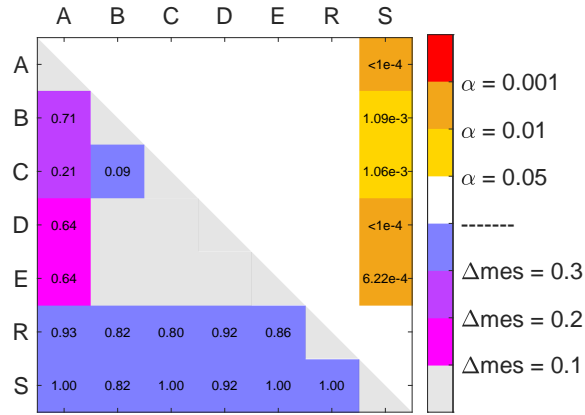

Rel. Time in Direction SSE, per bee, normalised to R

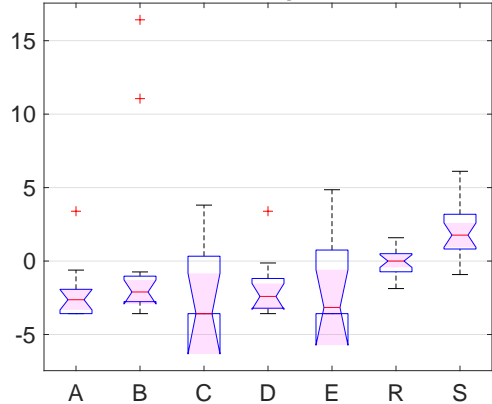

Significant Differences between Hives

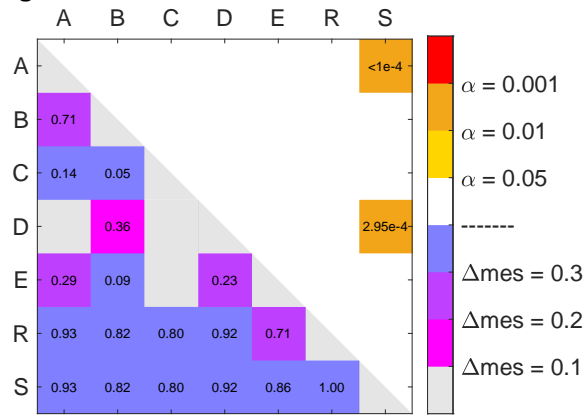

Rel. Time in Direction SE, per bee, normalised to R

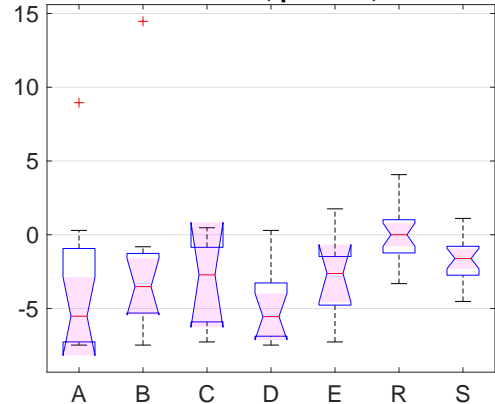

Significant Differences between Hives

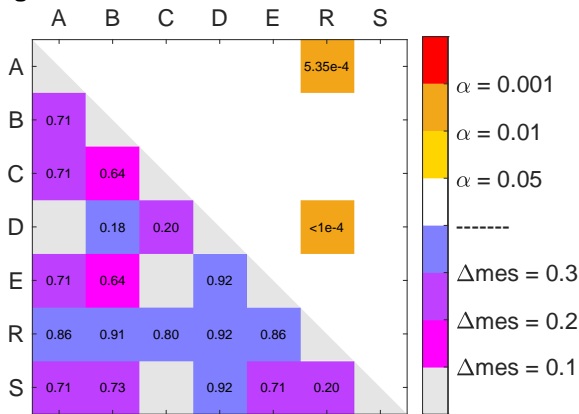

Rel. Time in Direction ESE, per bee, normalised to R

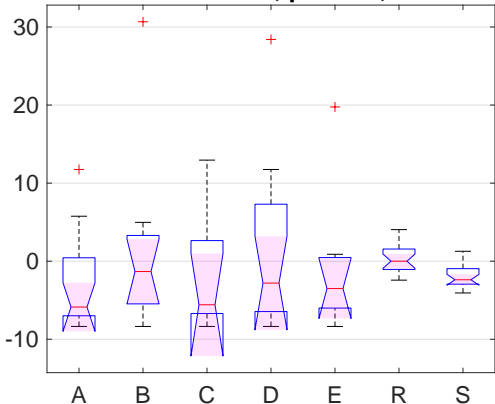

Significant Differences between Hives

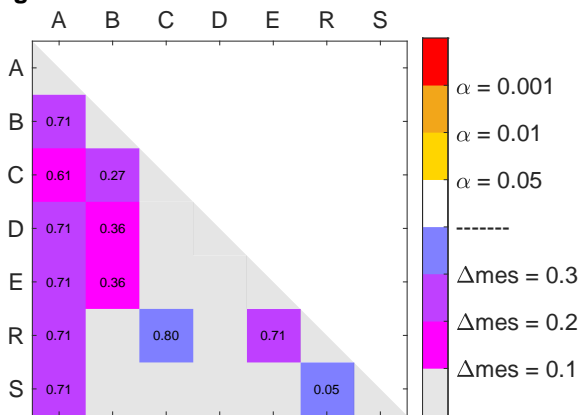

Rel. Time in Direction E, per bee, normalised to R

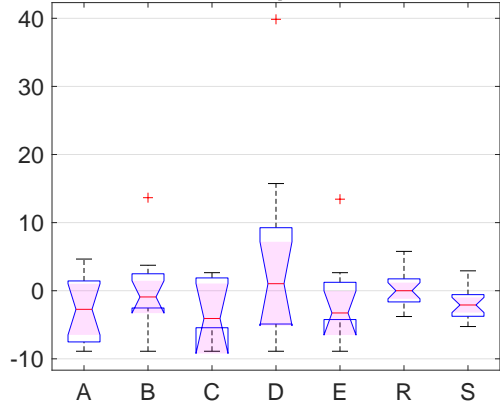

Significant Differences between Hives

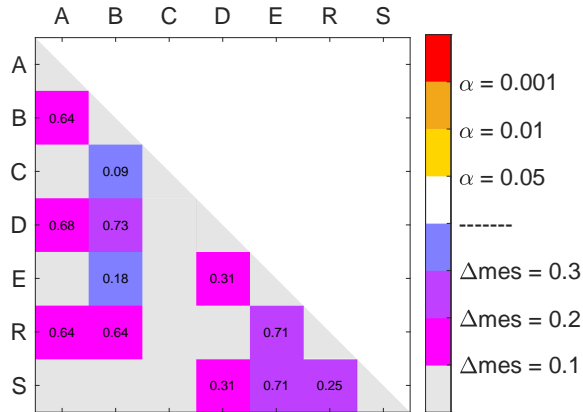

Rel. Time in Direction ENE, per bee, normalised to R

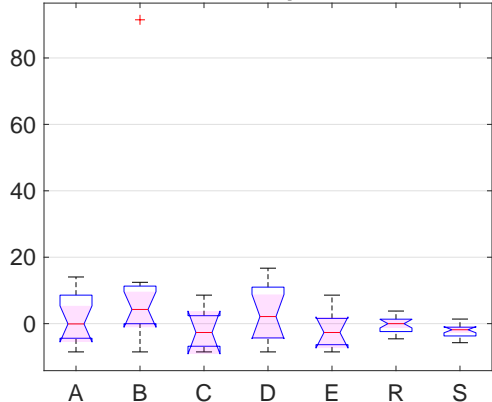

Significant Differences between Hives

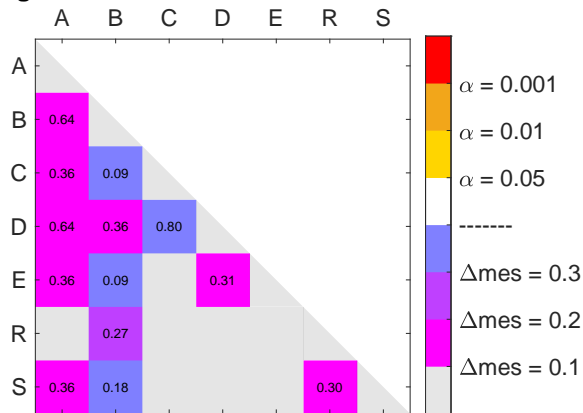

Rel. Time in Direction NE, per bee, normalised to R

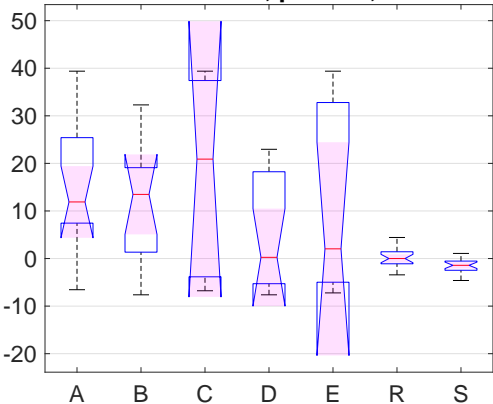

Significant Differences between Hives

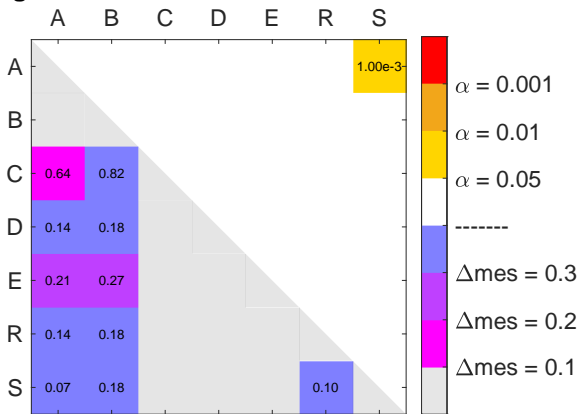

Rel. Time in Direction NNE, per bee, normalised to R

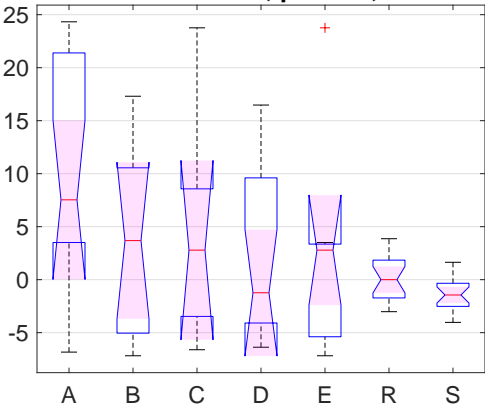

Significant Differences between Hives

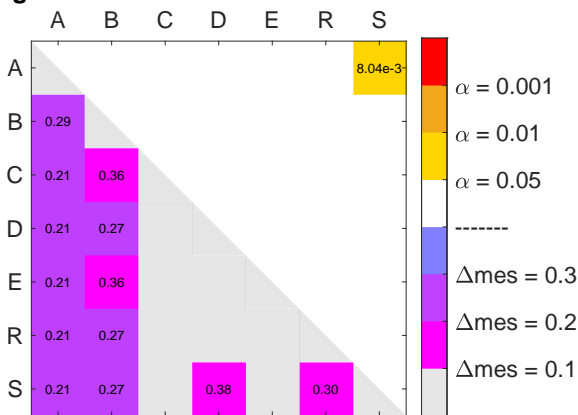

Rel. Time in Direction N, per bee, normalised to R

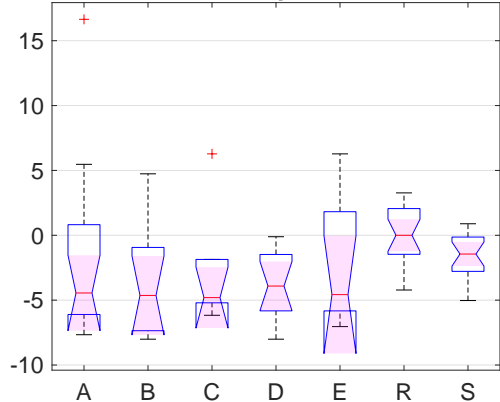

Significant Differences between Hives

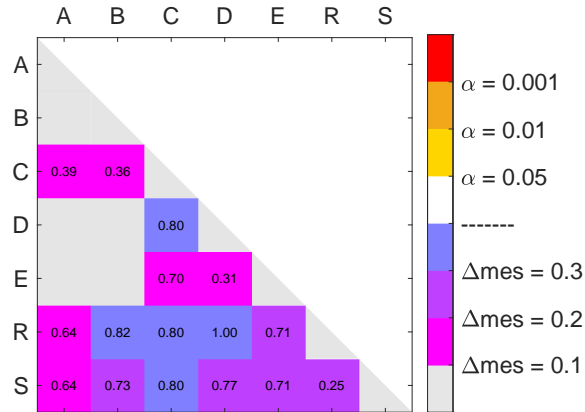

Rel. Time in Direction NNW, per bee, normalised to R

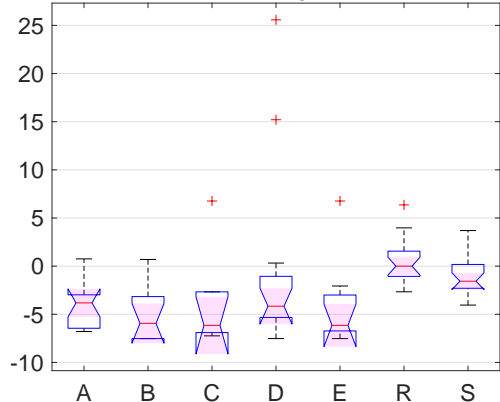

Significant Differences between Hives

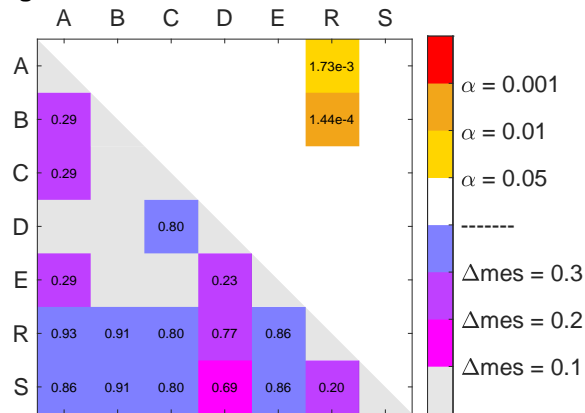



Rel. Time in Direction NW, per bee, normalised to R

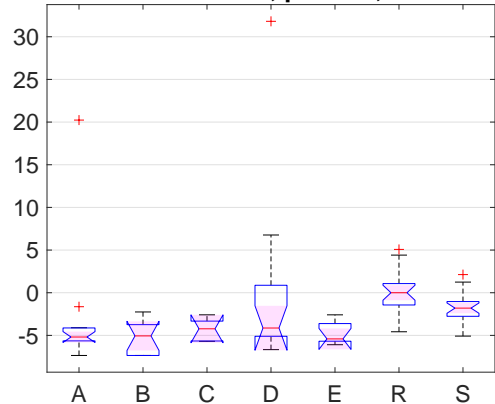

Significant Differences between Hives

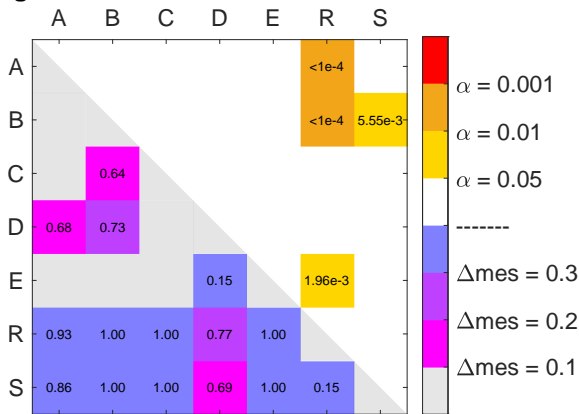

Rel. Time in Direction WNW, per bee, normalised to R

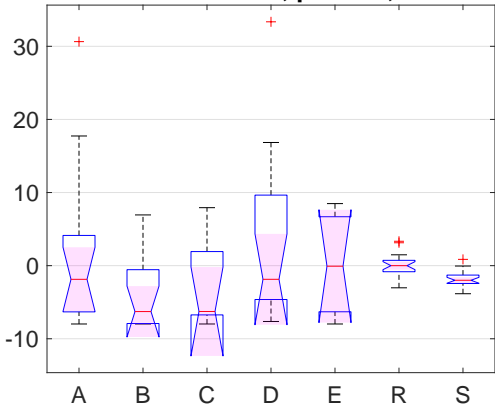

Significant Differences between Hives

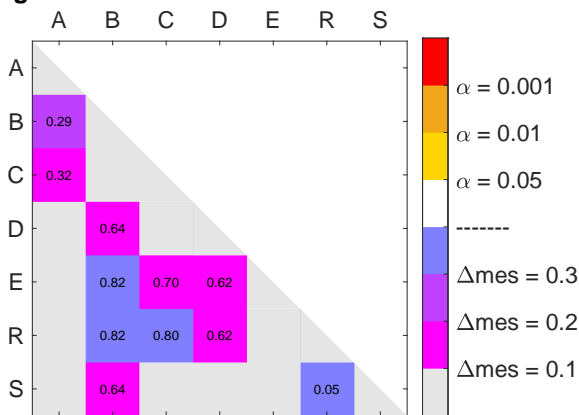

Supplement: Data_Sheet_2.pdf [file Data_Sheet_2.pdf]
